# Supplementary material for: Growth of InZnP/ZnS core/shell quantum dots with wide-range and refined tunable photoluminescence wavelengths
Source: Royal Society of Chemistry journal article supplement (doi:10.1039/d0dt00575d), 2020-01-01
Supplement: d0dt00575d1.pdf [file d0dt00575d1.pdf]

# Supporting Information

## Growth of InZnP/ZnS Core/Shell Quantum Dots with Wide-range and Refined Tunable Photoluminescence Wavelength

Jinyuan Zhang, Huaimin Gu\*.

Institute of Semiconductors, South China Normal University, Guangzhou 510631, China.

### S1 Experiments section

#### S1.1 Materials.

Indium(III) chloride (99.99%), zinc(II) chloride (99.99%), zinc(II) acetate ( $\text{Zn}(\text{OAc})_2$ , 99.99%), Dodecylamine (DDA, 98%), Oleylamine (OA, 85%), 1-octadecene(ODE, 95%), 1-Dodecanethiol (1-DDT, 98%), Tris(dimethylamino)phosphine ( $(\text{DMA})_3\text{P}$ , 97%) were purchased from Aladdin. All the chemicals were used without further purification.

#### S1.2 Synthesis of InP /ZnS or InZnP/ZnS Core/shell QDs.

##### S1.2.1 Synthesis of InP Core QDs.

In a typical synthesis, 0.08847 g of  $\text{InCl}_3$  (0.4mmol), 108  $\mu\text{l}$  of  $(\text{DMA})_3\text{P}$ , 3 ml of OA and 8 ml of Toluene were mixed in a teflon-lined autoclave with a capacity of 25 ml in a glove box filled with argon. The sealed autoclave was removed from the glove box and put into a vacuum drying oven of 180 °C, and the QDs were allowed to grow for 24 h. The crude solution was directly used for the growth of ZnS shell.

##### S1.2.2 Synthesis of InZnP Core QDs.

The same method as S1.1 but more 0.4 mmol of zinc chloride is added to the teflon-lined autoclave.

##### S1.2.3 Synthesis of InP /ZnS or InZnP/ZnS Core/shell QDs.

After autoclave cooling to room temperature, 0.272 g of  $\text{ZnCl}_2$  (2 mmol), 0.96 ml of n-DDT (4 mmol), 2 ml of Toluene, 1 ml of OA was add to the InP or InZnP crude solution in teflon-lined autoclave in a glove box filled with argon. The sealed

---

autoclave was removed from the glove box and put into a vacuum drying oven of 180 °C, and the QDs were allowed to grow for 24 h. After cooling to room temperature, The by-products was collected by centrifugation and discarded. InP/ZnS or InZnP/ZnS QDs are then precipitated and purified in ethanol and dispersed in Toluene, finally stored in a glovebox filled with argon.

### **S1.3 Synthesis of InZnP/ZnS Core/shell QDs with different Zn/In ratio in the growth of the InZnP core QDs.**

Similar to the S1.2, 0.0442 g of InCl<sub>3</sub>, 152 µl of (DMA)<sub>3</sub>P, 2 ml of OA, 1 ml TOP and 5 ml of Toluene were mixed in core growth, in ZnS shell coating process, 0.1363 g of ZnCl<sub>2</sub>, 0.48 ml of n-DDT, 1 ml of Toluene were add to the InP or InZnP crude solution.

### **S1.4 Synthesis of InP /ZnS or InZnP/ZnS Core/shell QDs with different P/In ratio.**

Similar to the S1.2, but the P/In ratio is 0.5 - 3 mmol with the dosage of InCl<sub>3</sub> is 0.4 mmol.

### **S1.5 Synthesis of InP /ZnS Core/shell QDs with different Zn/In ratio in shell coating porcess.**

Similar to the S1.3, but the Zn/In ratio is 0.5 – 6 mmol with the dosage of InCl<sub>3</sub> is 0.4 mmol.

### **S1.6 Synthesis of InZnP/ZnS Core/shell QDs using ODE and DDA as solvents.**

Similar to the S1.2, but in all steps, OA and toluene are replaced by DDA and ODE, respectively. Zinc acetate was used as the Zn precursor. During the size-sorted process, the QDs with different PL emission wavelengths can be obtained by continuously adding ethanol and centrifugation.

## S2 XRD patterns and peak positions of InP, InZnP, InP/ZnS and InZnP/ZnS QDs

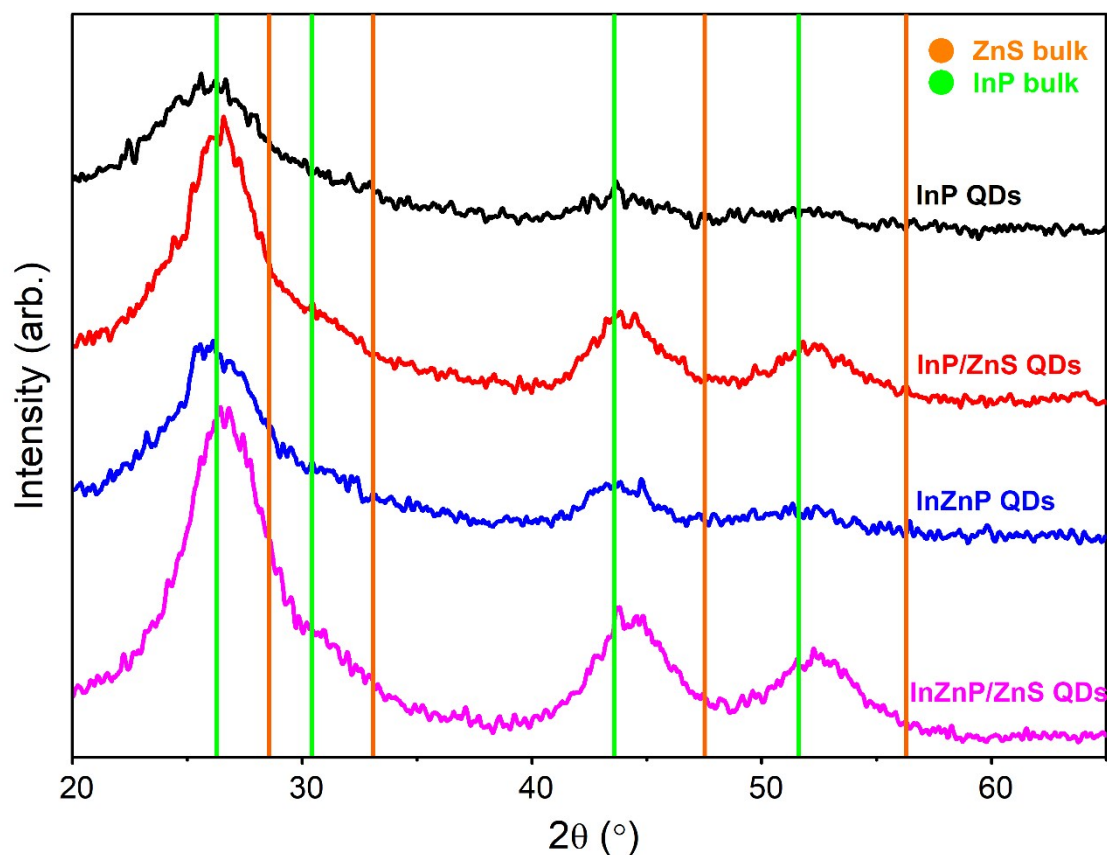

Fig. S2 XRD patterns of InP, InZnP, InP/ZnS and InZnP/ZnS QDs. The corresponding bulk reflections of zinc blende InP (green, PDF#32-0452) and inc blende ZnS (orange, PDF#05-0566) are compared with InP-based QDs.

Table S2. Peak positions of InP , ZnS bulk and InP-based QDs

|               | Peak Position ( $^\circ$ ) |       |       |       |
|---------------|----------------------------|-------|-------|-------|
|               | 1                          | 2     | 3     | 4     |
| InP Bulk      | 26.28                      | 30.43 | 43.6  | 51.62 |
| ZnS Bulk      | 28.56                      | 33.09 | 47.52 | 56.29 |
| InP QDs       | 26.23                      |       | 43.64 | 51.78 |
| InZnP QDs     | 26.57                      |       | 43.89 | 51.98 |
| InP/ZnS QDs   | 26.58                      |       | 44.08 | 52.13 |
| InZnP/ZnS QDs | 26.9                       |       | 44.14 | 52.27 |

### S3 Extended data for Zn addition by varying P/In precursors ratio.

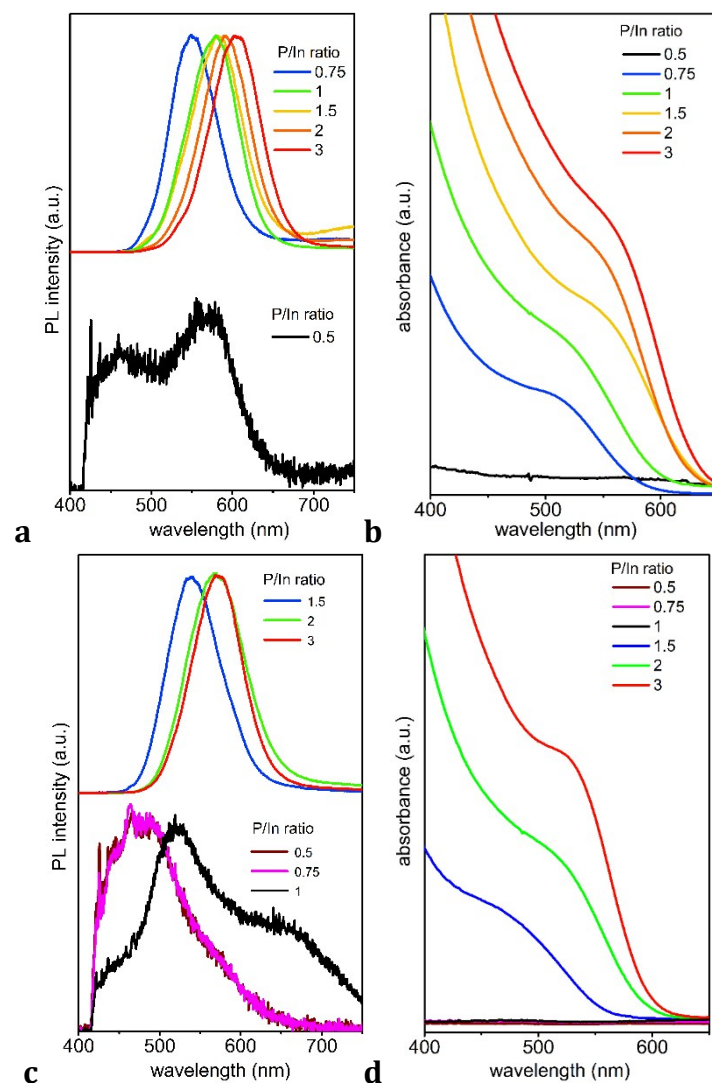

**Fig. S3** PL (a) and absorption spectra (b) of InP/ZnS QDs without Zn precursor addition, the PL wavelengths range from 549 nm to 602 nm. When the P/In ratio is 0.5, the InP/ZnS QDs can't be synthesized. PL (c) and absorption (d) spectra of InZnP/ZnS QDs without Zn precursor addition, the PL wavelengths range from 539 nm to 573 nm. When the P/In ratio is below 1, the InZnP/ZnS QDs can't be synthesized.

## S4 Absorption and emission spectra of InZnP/ZnS QDs with high PLQY

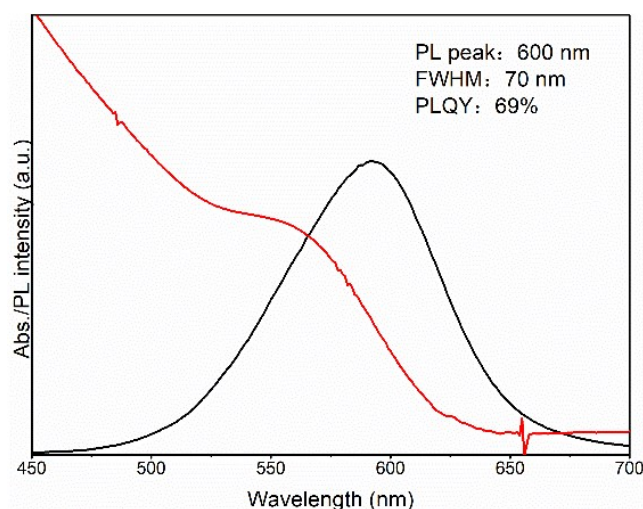

**Fig. S4** Absorption (red lines) and PL spectra (black line) of InZnP/ZnS QDs with high PLQY.

## S5 Performances of the InZnP/ZnS QDs

| QDs                   | In, Zn precursors                           | P precursors                                    | S precursors | PL peak (nm) | PL FWHM (nm) | PLQY (%) | Reference           |
|-----------------------|---------------------------------------------|-------------------------------------------------|--------------|--------------|--------------|----------|---------------------|
| InZnP/ZnS             | InCl <sub>3</sub> , ZnCl <sub>2</sub>       | (DMA) <sub>3</sub> P                            | t-DDT        | 600          | 75           | 69       | This work           |
|                       |                                             | (DEA) <sub>3</sub> P                            | n-DDT        | 580          | 65           | 57       |                     |
|                       |                                             |                                                 | t-DDT        | 585          | 67           | 67       |                     |
|                       |                                             | (DMA) <sub>3</sub> P/2 + (DEA) <sub>3</sub> P/2 | n-DDT        | 561          | 63           | 64       |                     |
|                       | InBr <sub>3</sub> , ZnBr <sub>2</sub>       | (DMA) <sub>3</sub> P                            | t-DDT        | 595          | 74           | 57       |                     |
|                       |                                             |                                                 | n-DDT        | 571          | 68           | 50       |                     |
|                       |                                             | (DMA) <sub>3</sub> P                            | t-DDT        | 533          | 70           | 35       |                     |
|                       |                                             |                                                 | n-DDT        | 524          | 64           | 33       |                     |
|                       |                                             | (DEA) <sub>3</sub> P                            | t-DDT        | 528          | 71           | 37       |                     |
|                       |                                             |                                                 | n-DDT        | 519          | 61           | 33       |                     |
|                       | InI <sub>3</sub> , ZnI <sub>2</sub>         | (DMA) <sub>3</sub> P                            | t-DDT        | 512          | 63           | -        |                     |
|                       |                                             |                                                 | n-DDT        | 498          | 70           | -        |                     |
|                       |                                             | (DEA) <sub>3</sub> P                            | t-DDT        | 503          | 68           | -        |                     |
|                       |                                             |                                                 | n-DDT        | 484          | 75           | -        |                     |
| InZnP/InGaP/GaP/ZnSeS | In(OAc) <sub>3</sub> , Zn(OAc) <sub>2</sub> | (TMS) <sub>3</sub> P                            | TOP-S*       | 565          | 52           | 75       | Ref. 1 <sup>1</sup> |
| InP/ZnSe/ZnS          | In(OAc) <sub>3</sub> , zinc stearate        | (TMS) <sub>3</sub> P                            | TOP-S        | 607          | 48           | 73       | Ref. 3 <sup>2</sup> |
| InP/GaP/ZnS           | In(OAc) <sub>3</sub> , Zn(OAc) <sub>2</sub> | (TMS) <sub>3</sub> P                            | DDT          | red          | 60           | 65       | Ref. 4 <sup>3</sup> |
| InP/ZnSe/ZnS          | In(OAc) <sub>3</sub> , Zn(OAc) <sub>2</sub> | (TMS) <sub>3</sub> P                            | TOP-S        | 630          | 35           | 100      | Ref. 5 <sup>4</sup> |
| InP/ZnSe/ZnS          | In(OAc) <sub>3</sub> , Zn(OAc) <sub>2</sub> | (TMS) <sub>3</sub> P                            | TOP-S        | 528          | 36           | 95       | Ref. 6 <sup>5</sup> |

\*: Top-S: Sulfur powder dissolve in trioctylphosphine.

## Reference

- 
1. F. Pietra, N. Kirkwood, L. De Trizio, A. W. Hoekstra, L. Kleibergen, N. Renaud, R. Koole, P. Baesjou, L. Manna and A. J. Houtepen, *Chem Mater*, 2017, **29**, 5192-5199.
  2. F. Cao, S. Wang, F. Wang, Q. Wu, D. Zhao and X. Yang, *Chemistry of Materials*, 2018, **30**, 8002-8007.
  3. J. P. Park, J. J. Lee and S. W. Kim, *Sci Rep*, 2016, **6**, 30094.
  4. Y. H. Won, O. Cho, T. Kim, D. Y. Chung, T. Kim, H. Chung, H. Jang, J. Lee, D. Kim and E. Jang, *Nature*, 2019, **575**, 634-638.
  5. Y. Kim, S. Ham, H. Jang, J. H. Min, H. Chung, J. Lee, D. Kim and E. Jang, *ACS Applied Nano Materials*, 2019, **2**, 1496-1504.
